# Supplementary material for: Facile Fabrication of N-Type Flexible CoSb3-xTex Skutterudite/PEDOT:PSS Hybrid Thermoelectric Films
Source: MDPI journal article supplement (doi:10.3390/polym14101986), 2022-05-13
Supplement: s1 [file s1]

## Supplementary Information

# Facile fabrication of *n*-type flexible CoSb<sub>3-x</sub>Te<sub>x</sub> skutterudite/PEDOT:PSS hybrid thermoelectric films

Asahi Kato <sup>1,2</sup>, Cédric Bourgès <sup>1</sup>, Hong Pang <sup>1</sup>, Daniel Gutiérrez <sup>1,2</sup>, Takeaki Sakurai <sup>2</sup> and Takao Mori <sup>1,2,\*</sup>

<sup>1</sup> International Center for Materials Nanoarchitectonics (WPI-MANA), NIMS, 1-1 Namiki, Tsukuba, Ibaraki, 305-0044, Japan; KATO.Asahi@nims.go.jp (A.K.); PANG.Hong@nims.go.jp (H.P.); BOURGES.Cedric@nims.go.jp (C.B.); MORI.Takao@nims.go.jp (T.M.)

<sup>2</sup> Graduate School of Pure and Applied Sciences, University of Tsukuba, 1-1-1 Tennodai, Tsukuba, Ibaraki, 305-8577, Japan; sakurai.takeaki.ft@u.tsukuba.ac.jp (T.S.)

\* Correspondence: MORI.Takao@nims.go.jp (T.M.); PANG.Hong@nims.go.jp (H.P.); sakurai.takeaki.ft@u.tsukuba.ac.jp (T.S.)

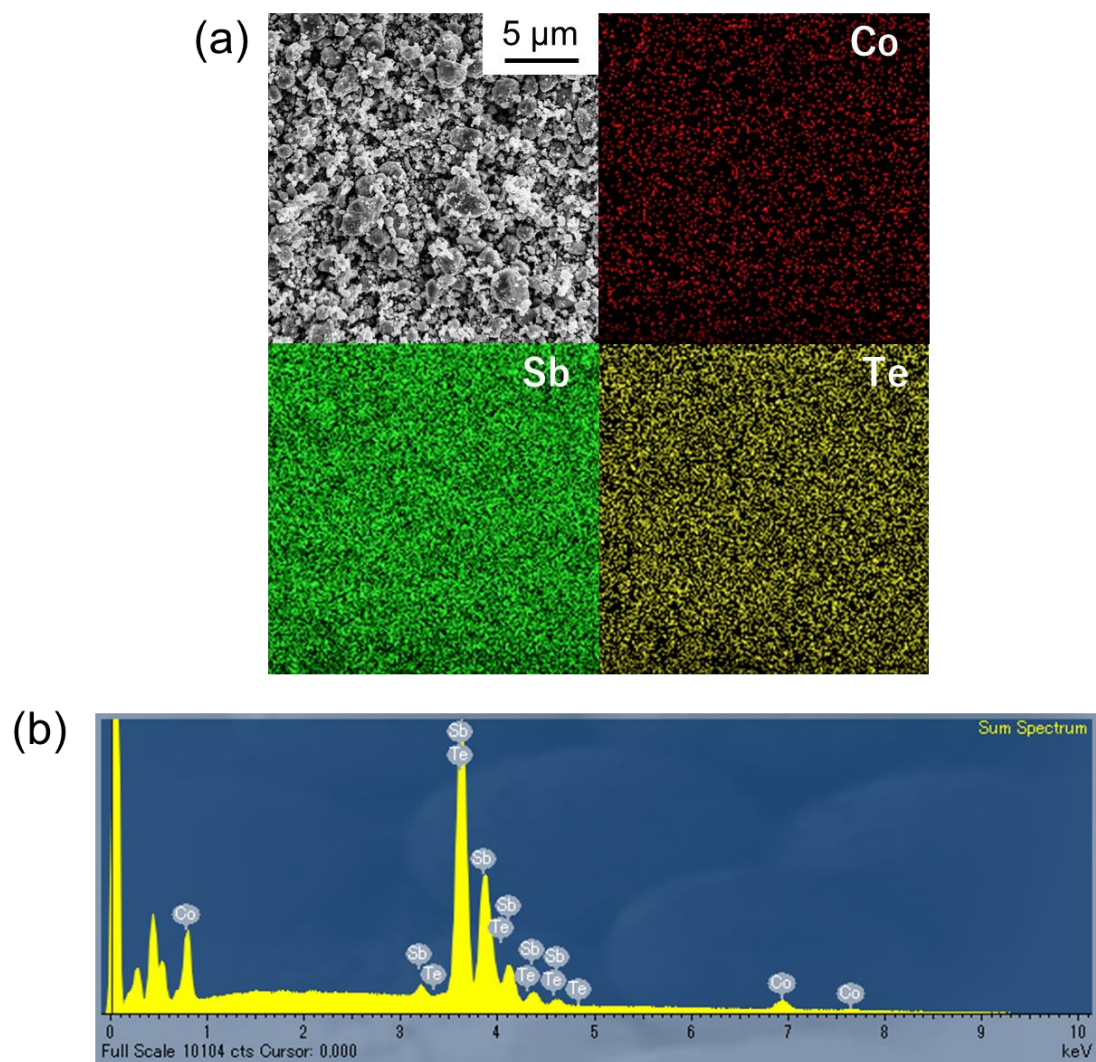

**Figure S1.** (a) SEM image and EDX mapping images of the ball-milled  $\text{CoSb}_{2.95}\text{Te}_{0.05}$  powder; (b) the corresponding EDX spectrum.

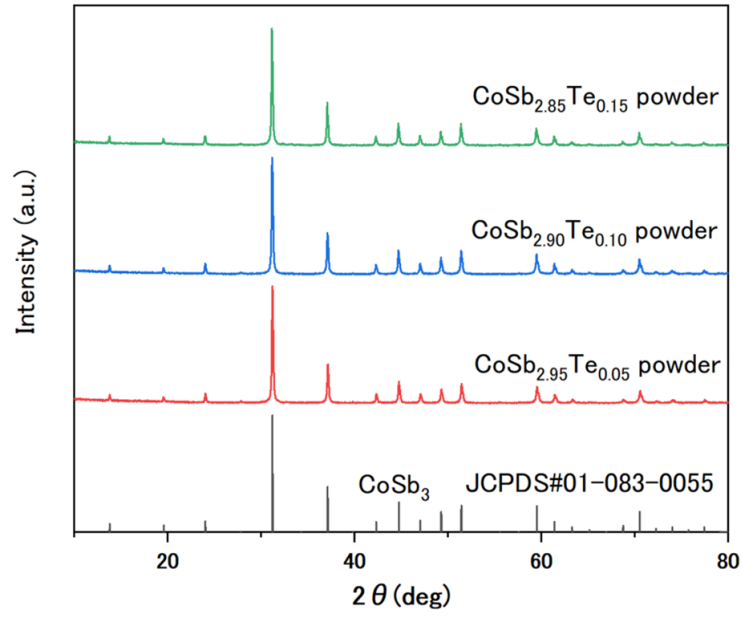

**Figure S2.** XRD patterns of the ball-milled  $\text{CoSb}_{3-x}\text{Te}_x$  powder with different amount of Te dopants ( $x = 0.05, 0.10, 0.15$ ).

**Table S1.** Cell parameters and reliability factors obtained from Rietveld refinement of XRD patterns ( $\lambda_{\text{Cu}} = 1.54056 \text{ \AA}$ ) of the  $\text{CoSb}_{3-x}\text{Te}_x$  ball milled powders and  $\text{XCoSb}_{2.95}\text{Te}_{0.05} / 1-\text{X}$  PEDOT:PSS hybrid films

| CoSb <sub>3-x</sub> Te <sub>x</sub> ball milled powders        |        |                     |                    |                |                  |
|----------------------------------------------------------------|--------|---------------------|--------------------|----------------|------------------|
| sample                                                         | a (Å)  | V (Å <sup>3</sup> ) | R <sub>Bragg</sub> | R <sub>F</sub> | Chi <sup>2</sup> |
| x=0.15                                                         | 9.0501 | 741.2               | 4.13               | 4.13           | 1.48             |
| x=0.10                                                         | 9.0487 | 740.9               | 4.82               | 4.2            | 1.49             |
| x=0.05                                                         | 9.0413 | 739.1               | 4.27               | 4.27           | 1.44             |
| XCoSb <sub>2.95</sub> Te <sub>0.05</sub> / 1-X PEDOT:PSS films |        |                     |                    |                |                  |
| X = 20%                                                        | 9.0405 | 738.9               | 4.45               | 4.91           | 1.20             |
| X = 40%                                                        | 9.0367 | 737.9               | 3.43               | 3.58           | 1.38             |
| X = 60%                                                        | 9.0367 | 737.9               | 3.81               | 4.3            | 1.39             |
| X = 80%                                                        | 9.0358 | 737.7               | 5.96               | 5.07           | 1.58             |
| X = 95%                                                        | 9.0368 | 738.0               | 5.88               | 4.72           | 1.75             |
| X = 97%                                                        | 9.0401 | 738.1               | 3.65               | 3.07           | 1.54             |
| X = 98%                                                        | 9.0375 | 738.1               | 8.24               | 6.08           | 2.03             |

**Table S2.** Thermoelectric properties of PEDOT:PSS with 5 vol% of DMSO and the  $\text{CoSb}_{2.95}\text{Te}_{0.05}$  skutterudite film sample at room temperature.

|                                                     | Seebeck coefficient | Electrical conductivity | Power factor            | Thermal conductivity |
|-----------------------------------------------------|---------------------|-------------------------|-------------------------|----------------------|
|                                                     | [ $\mu\text{V/K}$ ] | [S/cm]                  | [ $\mu\text{W/m K}^2$ ] | [W/m K]              |
| PEDOT:PSS<br>(DMSO 5vol%)                           | 16.8                | 1195                    | 33.8                    | 0.27 [1]             |
| $\text{CoSb}_{2.95}\text{Te}_{0.05}$<br>powder film | -174.8              | 0.031                   | 0.096                   | 7.33*                |

\* The thermal conductivity of the  $\text{CoSb}_{2.95}\text{Te}_{0.05}$  powder film is substituted by the thermal conductivity of the  $\text{CoSb}_{2.95}\text{Te}_{0.05}$  bulk sample to plot the series-connected model in Figure 3.

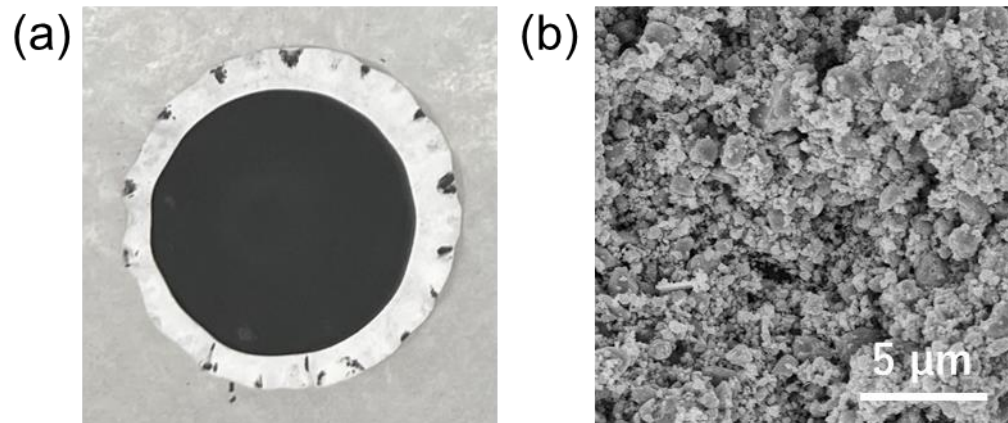

**Figure S3.** Cold-pressed  $\text{CoSb}_{2.95}\text{Te}_{0.05}$  powder film: (a) digital photo image; (b) SEM image.

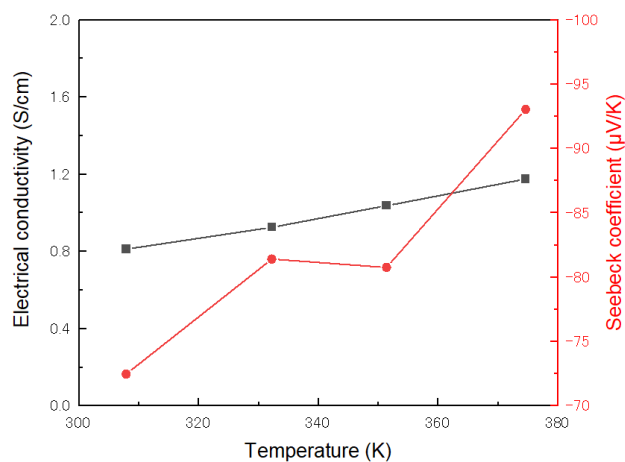

**Figure S4.** Electrical conductivity and the Seebeck coefficient of the 98wt% CoSb<sub>2.95</sub>Te<sub>0.05</sub> hybrid film with increasing temperature

**Table S3.** Thermoelectric properties of the CoSb<sub>3-x</sub>Te<sub>x</sub> (x = 0.05, 0.10, 0.15) bulk sample at room temperature.

|        | Seebeck coefficient | Electrical conductivity | Power factor           |
|--------|---------------------|-------------------------|------------------------|
|        | [μV/K]              | [S/cm]                  | [μW/m K <sup>2</sup> ] |
| x=0.05 | -179                | 1050                    | 3350                   |
| x=0.10 | -139                | 1360                    | 2620                   |
| x=0.15 | -124                | 1550                    | 2370                   |

## References

1. Li, Z.; Sun, H.; Hsiao, C.; Yao, Y.; Xiao, Y.; Shahi, M.; Jin, Y.; Cruce, A.; Liu, X.; Jiang, Y.; et al. A Free-Standing High-Output Power Density Thermoelectric Device Based on Structure-Ordered PEDOT:PSS. *Adv. Electron. Mater.* **2018**, *4*, 1–8.
